# Supplementary material
Source: HighWire-hosted journal article supplement (http://qshc.bmj.com/highwire/filestream/147081/field_highwire_adjunct_files/0/162116appendix1.pdf)
Supplement: 162116appendix1.pdf [file 162116appendix1.pdf]

## Appendix 1. Search Strategy

### PubMed:

((pediatric\*[tiab] OR paediatric\*[tiab] OR child\*[tiab] OR neonat\*[tiab] OR infant[mh] OR child[mh]) AND (medication errors[mh] OR "medication errors"[tiab] OR preventable adverse event[tiab] OR "adverse drug events"[tiab])) AND eng[la] AND 2000:2005[dp] NOT review[pt]

### EMBASE:

- #1. 'preventable adverse event':ti,ab OR 'adverse drug event':ti,ab
- #2. 'medication error'/exp OR 'medication error':ti,ab OR 'medication errors':ti,ab
- #3. pediatric\*:ti,ab OR paediatric\*:ti,ab OR child:ti,ab OR 'child'/exp OR 'infant'/exp OR neonat\*:ti,ab
- #4. #1 OR #2
- #5. #4 AND #3
- #6. [2000-2005]/py AND [english]/lim
- #7. #5 AND #6
- #8. review:it
- #9. #7 NOT #8

### CINAHL:

- S3 (S1 AND S2 ) limited to 2000-2005 py  
S2 MH ( child OR infant ) Or AB ( Child\* OR OR infant\* OR neonat\* )  
S1 MH medication errors Or AB medication error\*
